# Supplementary material
Source: PubMed Central journal article supplement (PMC6003490)
Supplement: pnas.1717135115.sapp.pdf [file pnas.1717135115.sapp.pdf]

## SUPPLEMENTARY INFORMATION

*The transcriptomic context of DRD1 is associated with prefrontal activity and behavior during working memory*

### INVENTORY OF SUPPLEMENTARY INFORMATION [SI]

#### 1. SI MATERIALS AND METHODS

WGCNA PREPROCESSING

STATISTICAL ANALYSES ON THE *DRD1* GENE SET

PARCELING PROCEDURE

SNP ASSOCIATION STUDY

IMAGING AND BEHAVIORAL STUDY

MEDIATION ANALYSIS ON WM PHENOTYPES

#### 2. SI RESULTS

PARCELING RESULTS

SNP ASSOCIATION STUDY AND CO-EXPRESSION POLYGENIC INDEX COMPUTATION

SOCIODEMOGRAPHIC AND BEHAVIORAL DATA

MEDIATION ANALYSIS

#### 3. SI REFERENCES

#### 4. SI TABLES AND FIGURES

## 1. SI MATERIALS AND METHODS

### WGCNA PREPROCESSING

We included probes in the categories human constitutive exonic (i.e., probes tagging exons common to multiple isoforms), human alternative exonic (i.e., probes tagging isoform-specific exons), and human mRNA (i.e., tagging untranslated regions of gene-coding mRNA). When genes were represented by multiple probes highly correlated with each other (Bonferroni-corrected  $\alpha < .01$ , i.e. Pearson's  $r = .36$ ), we selected the ones with the greatest variance, following previous work (1). We factored out the effects of confounding variables from each gene's expression using a stepwise linear model, selected via the Akaike Information Criterion and applied a rank-based inverse normal transformation to reduce the impact of outliers and deviations from normality (2). Thus, we obtained a  $199 \times 23,636$  matrix of expression residuals reflecting for each subject transcription levels of all genes relative to the entire sample considered. These variables were used for the identification of an unsigned co-expression network (3). WGCNA detected non-overlapping sets of co-expressed probes, called modules, based on the analysis of gene-gene Pearson's correlation indices. The correlation matrix was raised to an exponent  $\beta$  selected to guarantee scale invariance (3, 4). Scale invariance is reckoned as an important property of biological networks. A scale invariant network includes key genes, called hubs, with many connections, and more peripheral genes with selective connections. Importantly, a scale invariant network can be examined at different granularities, i.e., one can focus on larger or smaller groups of genes (called modules) based on the parameters used to identify the network. For the network at hand,  $\beta = 4$  guaranteed scale invariance ( $R^2 = .86$ ; see (3)); minimum gene set size was 40 genes and minimum height for merging gene sets was .05.

## PARCELING PROCEDURE

*DRDI* clustered within a module including 2452 probes, a large number difficult to study as a single unit. This module could not be parceled even when lowering cut height down to .01 (note that WGCNA default is .15). Since the WGCNA network has, by definition, a nested structure with highly connected hub genes and a modular organization, it should be possible to parcel a module into smaller gene sets like the transcriptome is parceled into modules by WGCNA. Larger gene sets will include also genes with weak relationships, while smaller sets will eventually yield a loss of information. Parceling a gene co-expression module requires the definition of a target variable for optimizing the outcome. Therefore, we focused on information content associated with the module, as indexed by entropy. Entropy  $H$  is intrinsically related to the information content provided by a certain partition, as information  $I$  is, by definition:

$$I = H_{\max} - H$$

where  $H_{\max}$  is the maximum entropy of a system with the same number of elements. For a weighted complex network:

$$H_{\max} = W \log_2 W$$

with  $W$  being the total amount of the network weights. Given the above definition, entropy and information are inversely proportional up to an additive constant which is the maximum entropy of the observed system. Thus, we iteratively parceled the module until we identified the *DRDI* gene set characterized by the maximum information content indexed in terms of entropy of the nodes at multiple parceling steps. At each parceling step, we used betweenness-based thresholding - i.e., a centrality measure of a given gene based on how many of the connections in each module are mediated by that gene (5) - to cluster genes into sets, and then we iterated the procedure on the gene set that included *DRDI*. The parceling procedure allowed us to identify the *DRDI* gene set, within the original WGCNA module, with the maximum average betweenness.

The optimization aims to obtain a trade-off between two opposite trends: if an optimal partition exists, it should be outlined by the presence of a local maximum which identifies a stronger and more stable network of genes around *DRD1*; however, as the cardinality of selected genes decreases when iteratively parceling the *DRD1* gene set, the informative content should decrease, as a smaller number of genes belong to the set. Thus, the iterative parceling of the *DRD1* set is expected on the one hand to outline a cluster of genes which carry the maximum information, and on the other hand to show that further partitions cannot yield any substantial improvement.

## **STATISTICAL ANALYSES ON THE DRD1 GENE SET**

To understand how *DRD1* expression was related with gene set expression, we computed the Pearson's correlation of *DRD1* expression with the first principal component of gene set expression (gene set eigengene, GSE). The GSE was not significantly associated with any of the confounders considered in the preprocessing (age, sex, ethnicity, RIN, pH, post-mortem interval; all  $p > .05$ ), suggesting successful noise removal. Additionally, we tested whether the expressions of *DRD1* and *DRD2* were correlated in Braincloud using Spearman's  $\rho$ .

In BrainEAC, we selected high quality observations with  $RIN \geq 6$  ( $N = 26$ ; note that all Braincloud and CMC samples had  $RIN \geq 7$ ). The CMC sample included 179 healthy subjects of Caucasian or African American ancestry, RNA integrity number ( $RIN$ )  $\geq 7$  (see Fromer et al. (6) for details on sample collection and characteristics). We filtered out transcripts with median Reads Per Kilobase per Million mapped reads (RPKMs)  $\leq 0.1$  and 107 of the 126 genes in the *DRD1* gene set survived. We used the R package RUVcorr to remove noise from the replication gene expression datasets. RUV (removal of unwanted variation) derives estimates of systematic noise directly from the data

and is ideally suited for gene co-expression analyses. In BrainEAC and in CMC, we used RUV to extract five latent confounding variables and marginalized gene expression values for them.

We investigated whether gene expression covariation in both replication datasets had the same direction observed in Braincloud. To this aim, we plotted gene by gene the factor loadings obtained via Principal Component Analysis in the discovery and replication datasets. When a gene had a positive or negative loading in both datasets was defined as ‘concordant in sign’ while in the other cases ‘discordant in sign’. We used two-sided binomial exact tests to assess whether genes ‘concordant in sign’ outnumbered genes ‘discordant in sign’ ( $p$ -value  $< .05$ ).

## **SNP ASSOCIATION STUDY**

We used SNPs & Variation Suite (SVS, GoldenHelix, Bozeman, Montana) to select SNPs associated with the gene set eigengene (GSE). We restricted our analyses to SNPs whose genotypes were available both in Braincloud and in the samples recruited for the behavioral and fMRI studies (546.308 SNPs in common out of 654.333 Braincloud SNPs). SNPs significantly deviating from Hardy-Weinberg equilibrium ( $\alpha = .003$ ; (7)) or with a Minor Allele Frequency (MAF)  $\leq .1$  were excluded (3) because the sample size was too limited to investigate rare variants. Furthermore, we reasoned that a SNP associated with co-expression, but not associated with the expression of any single gene, would possibly be a spurious result. Thus, we aimed to increase the biological plausibility of the findings by filtering out SNPs that were not statistically associated with any of the genes in the set at nominal  $p$ -value ( $\alpha = .05$ ).

To associate SNPs with the GSE, we used ANOVAs with jackknife resampling in a leave one-out framework. In other words, we used 199 samples including 198 subjects by leaving out one

subject per run; for each of the 199 samples, we computed one ANOVA per SNP. Then, we repeated the procedure for each SNP and each sample and obtained 199 p-values of the GSE association with each SNP. Finally, we computed the median p-value per SNP and ranked SNPs by this p-value. The present procedure is more robust compared to our previous report (3) because we performed additional resampling to reduce the influence of extreme expression values. Moreover, we asked whether these SNPs were associated with gene expression in their own locus and with *DRDI* expression. To this aim, we computed ANOVAs using the selected SNP genotypes as independent factors and the expression of the closest gene of the set as the dependent variable. We also assessed the biological significance of the SNP set identified by interrogating the software Haploreg (<http://archive.broadinstitute.org/mammals/haploreg>). Haploreg is a dataset of genetic regulatory elements, including cis- and trans-eQTL hits across multiple tissues according to previous genomic studies (8-10).

After SNP selection, we computed the Polygenic Co-expression Index (PCI). This step is needed to translate the knowledge we gained via data mining on post-mortem samples into brain activity prediction in living subjects. In other words, we used genetic variants to compute a proxy of individual *DRDI* gene set co-expression which we called *DRDI*-PCI. For each SNP, we used the major allele homozygote (MH) as the reference group. We computed a distance measure for the heterozygous and the minor homozygous samples relative to the MH group (7). After having defined the effect of each genotypic population within individual SNPs, we defined the PCI of each participant as the arithmetic mean of genotypic effects. We used a slightly modified computation of the genetic index compared to previous works, i.e., we used the  $A'$  index instead of the  $d'$  because  $A'$  can be computed without assuming a normal distribution of the variables (11, 12).

We tested whether the PCI was associated with any of the confounders considered in the preprocessing (age, sex, ethnicity, RIN, pH, post-mortem interval) by means of Pearson's

correlations and independent samples t-tests. To assess the predictive power of the PCI, we used cross-validation. We were aware that 10-fold cross-validation is the popular framework for model selection (13, 14). Nonetheless, leave-one-out cross-validation tends to yield unbiased estimations (at a cost of high variance) and with the current sample size it could be preferred with a limited risk of overfitting. In particular, (i) at each cycle of the cross-validation, we computed the leave-one-out GSE in 198 out of 199 subjects; (ii) we ranked SNPs based on the p-value of their association with the GSE; (iii) we retained the top 13 SNPs, i.e., the same number of SNPs included in our PCI. We chose this method because imposing a p-value threshold would vary, for each iteration, the amount of information (i.e., the number of SNPs) and the range of the polygenic score (polygenic scores with more SNPs tend to have smaller ranges), ultimately adding noise to the procedure; (iv) we computed SNP weights and used them to compute the *DRDI*-PCI in the left-out subject; (v) we computed Pearson's correlation of the cross-validated *DRDI*-PCI in the test set (i.e., the ensemble of left-out subjects) with the GSE as well as with *DRDI* expression (Supplementary Figure 2). We used a meta-analytic approach to compare the effect size of the GSE prediction in the three datasets employed. We computed a fixed effect meta-analysis over Braincloud, BrainEAC, and CMC using the *metafor* R package. For the discovery set, Braincloud, we used leave-one out cross-validation (LOOCV) to estimate unbiased effect size. Cochran's Q-test for heterogeneity served to assess the combinability of studies. Finally, we used the cross-validated data also to assess the effect of ethnicity on the relationship between the *DRDI*-PCI and the GSE by means of an ANCOVA.

## **IMAGING AND BEHAVIORAL STUDY**

### *Inclusion criteria and socio-demographic assessment*

All participants were assessed for IQ (WAIS-R) (13), handedness (Edinburgh Inventory) (14), and socio-economic status (Hollingshead Four Factor Index of Social Status) (15). All individuals were

evaluated with the Structured Clinical Interview (16) for the Diagnostic and Statistical Manual of Mental Disorders to rule out current or past psychiatric disorder. Other exclusion criteria were first-degree familiarity for major psychiatric disorders, history of drug or alcohol abuse, active drug use in the past year, brain alterations or illness as evaluated by a board-certified neuroradiologist (TP), head trauma with loss of consciousness, and any relevant medical condition. Only participants whose behavioral accuracy was significantly above chance were included in the study, as detailed by Pergola et al. (3). In particular, given the number of trials in each session, we derived a 95% confidence interval for chance level performance (asymptotic threshold: accuracy = 38% for the 3-back fMRI study, which we applied to all WM conditions). Accuracy  $\geq$  38% could be statistically discriminated from chance level and was an inclusion criterion for the study. Additionally, only individuals whose scans were not affected by scanning artifacts or excessive movement were included in the study.

### *Working memory task*

The term “N-Back” refers to the number of items - back in the sequence of stimuli - participants were required to maintain to perform the task. The stimuli consisted of numbers shown in random sequence and displayed at the points of a diamond-shaped box. There was a non-memory control condition (0-Back) that simply required subjects to identify the stimulus currently seen. In the WM condition, the task required the recollection of a number seen one (1-Back), two (2-Back) or three stimuli (3-Back) before, while continuing to encode additionally incoming stimuli. The stimuli were arranged in 30 s blocks including 2 s of instructions and 14 task trials lasting 2 s each (stimulus presentation: 500 ms, inter-stimulus interval of 1500 ms). During fMRI, we used a block design, consisting of four blocks of the control condition alternating with four blocks of each WM condition. Participants did not exit the scanner during the breaks. Stimuli were shown via a back-



projection system and behavioral responses were recorded through a fiber-optic four-button MRI-compatible pad within the scanner. Participants responded with their right hand with a four-button MRI-compatible pad within the scanner.

In the behavioral studies, stimuli were presented on a computer monitor and participants responded with their right hand on the numeric keypad of a standard computer keyboard.

### *fMRI data acquisition and analysis*

Blood oxygen level-dependent (BOLD) signal was recorded by a GE Signa 3T scanner (General Electric, Milwaukee, WI), using a gradient-echo planar imaging sequence (repetition time, 2000 ms; echo time, 28 ms; 20 interleaved axial slices; thickness, 4 mm; gap, 1 mm; voxel size,  $3.75 \times 3.75 \times 5$  mm; flip angle,  $90^\circ$ ; field of view, 24 cm; matrix,  $64 \times 64$ ). The first four scans were discarded to allow for equilibration effect. Imaging data quality was ascertained as detailed elsewhere (3).

We realigned the images to correct for motion artifacts using the Realign and Unwarp function (SPM12). Movement parameters were extracted to exclude data affected by excessive head motion (2.5 mm of translation or  $2.5^\circ$  of rotation). Realigned images were resliced to a 3.75 mm isotropic voxel size, spatially normalized into a standard space (Montreal Neurological Institute) by using a 12-parameter affine model, and smoothed with a 10 mm full-width at half-maximum isotropic kernel. Thus, 24 regressors of movement were added in the statistical model using the Friston24 model (17). Furthermore, a binary regressor of no-interest, indicating volumes with excessive movement (scan-to-scan motion  $> 1$ mm) was included in the model. After spatial pre-processing, we estimated one boxcar model convolved with the hemodynamic response function per condition. Then, effects of condition at individual level were evaluated producing a t statistical map for the contrasts of interest (1-back versus 0-back, 2-back versus 0-back and 3-back versus 0-back). These individual contrast images were used for group-level analyses.

In the fMRI discovery sample, we tested the association of the *DRDI*-PCI with brain

activation using a general linear model (within-subject factor: load [1-back, 2-back, 3-back]; between-subject factor: gender; continuous predictors: linear and quadratic terms of the *DRD1*-PCI and of the *DRD2*-PCI; covariates: age and socio-economic status, -which was associated with the PCI- ). In the fMRI replication sample, we computed an ANCOVA on the 2-Back > 0-Back contrast (between-subject factor: gender; continuous predictors: linear and quadratic terms of the *DRD1*-PCI; covariates: age and socio-economic status; whole brain FWE corrected  $p < .05$ ; cluster extent threshold=5).

### *Behavioral analyses*

In the behavioral discovery sample, we computed the differential accuracy between 2-Back and 1-Back ( $\Delta_{2-1}$ ) and between 3-Back and 2-Back ( $\Delta_{3-2}$ ) (18). Thus, we computed a repeated measures general linear model (within-subject factor: load [ $\Delta_{2-1}$ ,  $\Delta_{3-2}$ ]; between-subject factor: gender; continuous predictors: linear and quadratic terms of the *DRD1*-PCI; covariates: age, and socio-economic status;  $\alpha = .05$ , two tailed). For the behavioral replication sample, we computed a general linear model with  $\Delta_{2-1}$  as the dependent variable, gender as the between-subject factor, the linear and quadratic terms of the *DRD1*-PCI and of the *DRD2*-PCI as continuous predictors, as well as age and socio-economic status as covariates ( $\alpha = .05$ , one tailed).

### *Assessment of the relationship between the DRD1-PCI and socio-demographics*

After genotyping, the *DRD1*-PCI was computed for all subjects. We included age and gender as nuisance covariates in all analyses to account for demographic variability within and between samples. We assessed the associations between the *DRD1*-PCI and possible confounding variables (socio-economic status, handedness and IQ;  $\alpha = .1$ ) in all of the samples using Pearson's correlation analyses. Variables correlated with the *DRD1*-PCI in either of the samples were included in all

statistical models in the behavioral and imaging investigations to prevent misattributing the effect of confounding variables to the *DRD1*-PCI.

## **MEDIATION ANALYSIS ON WM PHENOTYPES**

We designed a mediation model to assess whether the  $\Delta\text{WM}$ -*DRD1*-PCI relationship was direct or mediated by brain activity; a separate mediation/moderation model assessed whether the *DRD2*-PCI moderated that relationship. Both models are reported in Supplementary Figure 5, which also reports the weights obtained in the discovery sample. We used the SPSS toolbox PROCESS (19) to run the mediation analyses. Brain activity was indexed by voxels in which activity was associated with both PCIs (negative for the *DRD1*-PCI, positive for the *DRD2*-PCI; null conjunction,  $p < .05$ ). We identified a left and a right prefrontal clusters ( $x, y, z: 38, 53, 20$ ;  $x, y, z: -37, 49, 20$ ) from which we extracted BOLD signal change using MarsBaR (<http://marsbar.sourceforge.net>). We averaged the signal change in these two ROIs because we did not hypothesize different mediation paths for the left and right hemisphere. The linear term of the *DRD1*-PCI was the independent variable, mean  $\Delta\text{WM}$  across loads was the dependent variable, PFC BOLD signal change was the mediator (first model). In the second model, both linear and quadratic *DRD2*-PCI were moderators of the relationship between the *DRD1*-PCI and brain/behavioral phenotypes. Age, gender, socio-economic status and the quadratic term of the *DRD1*-PCI were entered as nuisance covariates.

We replicated the effects found significant in the discovery set in additional mediation/moderation models computed in the fMRI replication set. Also in this dataset, we indexed brain activity using a cluster associated with both PCIs (null conjunction,  $p < .05$ ;  $x, y, z: -33, 30, 46$ ). In both samples, data were standardized before being entered in the model. We used bootstrap estimates of the confidence intervals (5000 resamplings) to confirm the significance of the results.

## 2. SI RESULTS

### PARCELING

The iterative procedure we employed reached a plateau of maximum information content after four runs. More in detail, we observed that the information content reached a plateau, meaning that further parceling could not yield any increment of the informative content of the selected community. Besides, as information depends on the cardinality of the community, we also normalized entropy with the number of nodes and observed that average entropy reached a sound plateau (Supplementary Figure 1).

### SNP ASSOCIATION STUDY AND CO-EXPRESSION POLYGENIC INDEX

#### COMPUTATION

A set of 3717 SNPs within 100 kbp from the genes included in the *DRDI* gene set that we identified had genotypes available in Braincloud, BrainEAC and in the GWAS dataset of our volunteers. Of these SNPs, 3079 were associated with the expression of at least one gene of the set ( $p < .05$ ). After jackknife resampling, we obtained a set of 13 independent SNPs associated with the GSE with median resampled  $p < .005$ . None of these SNPs have been previously reported in association with imaging or cognitive phenotypes. Cross-validation and replication datasets supported the reliability of the prediction (Supplementary Figure 2). The estimated meta-analytical effect size was  $r = -0.156$  (95% confidence intervals:  $-0.25 - -0.06$ ;  $p = 0.0016$ ). The three studies were not significantly heterogeneous (Cochran's  $Q = 1.13$ ,  $p$ -value =  $0.57$ ). Supplementary Figure 3 shows that the effects in the cross-validated Braincloud data were not driven by one of the ethnicities, but were uniform across both.

## **SOCIODEMOGRAPHIC AND BEHAVIORAL DATA**

Correlation analyses revealed marginally significant associations between socio-economic status and both the linear ( $R = .15$ ,  $p = .074$ ) and quadratic ( $R = -.14$ ,  $p = .086$ ) terms of the *DRDI*-PCI only in the fMRI/behavioral discovery sample. Therefore, socio-economic status was included in all tests as a nuisance variable. All other tests yielded no significant results (all  $p > .1$ ). In addition to the effect of the *DRDI*-PCI, the behavioral analysis on the discovery sample revealed main effects of age ( $F_{1,144} = 5.6$ ;  $p = .018$ ; partial  $\eta^2 = .038$ ), and gender ( $F_{1,144} = 4.6$ ;  $p = .033$ ; partial  $\eta^2 = .031$ ) on  $\Delta_{WM}$ . Higher age and female gender were associated with lower  $\Delta_{WM}$  scores.

## **MEDIATION ANALYSIS**

Supplementary Figure 5 illustrates the models used and the results of the discovery sample. The total effect (direct and indirect) of the *DRDI*-PCI on  $\Delta_{WM}$  was significant (standardized coefficient = .21;  $p = .014$ ). The relationship between *DRDI*-PCI and  $\Delta_{WM}$  was largely mediated by prefrontal activity: while the direct effect was marginally significant (standardized coefficient = .16;  $p = .063$ ; 95% confidence interval [-.0083; .32]; bootstrap interval [.0022; .34]), the indirect effect was significantly different from zero (standardized coefficient = .051; 95% confidence interval [.0038; .11]; bootstrap interval [.0022; .14]). However, none of these effects were significant in the fMRI replication sample (all  $p > .05$ ).

When taking into account moderation effects by the *DRD2*-PCI, the indirect effect of the *DRDI*-PCI remained significant but was not significantly moderated (Supplementary Figure 5); the direct effect of the *DRDI*-PCI was significant and was moderated by the quadratic *DRD2*-PCI. Also in this case, the effects were not significant in the replication sample (all  $p > .05$ ).

## REFERENCES

1. Roussos P, Katsel P, Davis KL, Siever LJ, & Haroutunian V (2012) A system-level transcriptomic analysis of schizophrenia using postmortem brain tissue samples. *Archives of general psychiatry* 69(12):1205-1213.
2. Beasley TM, Erickson S, & Allison DB (2009) Rank-based inverse normal transformations are increasingly used, but are they merited? *Behavior genetics* 39(5):580-595.
3. Pergola G, *et al.* (2017) DRD2 co-expression network and a related polygenic index predict imaging, behavioral and clinical phenotypes linked to schizophrenia. *Translational psychiatry* 7(1):e1006.
4. Zhang B & Horvath S (2005) A general framework for weighted gene co-expression network analysis. *Statistical applications in genetics and molecular biology* 4:Article17.
5. Barrat A, Barthelemy M, Pastor-Satorras R, & Vespignani A (2004) The architecture of complex weighted networks. *Proc Natl Acad Sci U S A* 101(11):3747-3752.
6. Fromer M, *et al.* (2016) Gene expression elucidates functional impact of polygenic risk for schizophrenia. *Nature neuroscience* 19(11):1442-1453.
7. Pergola G, *et al.* (2016) Combined effect of genetic variants in the GluN2B coding gene (GRIN2B) on prefrontal function during working memory performance. *Psychological medicine* 46(6):1135-1150.
8. Westra HJ, *et al.* (2013) Systematic identification of trans eQTLs as putative drivers of known disease associations. *Nat Genet* 45(10):1238-1243.
9. Lappalainen T, *et al.* (2013) Transcriptome and genome sequencing uncovers functional variation in humans. *Nature* 501(7468):506-511.
10. Consortium GT (2015) Human genomics. The Genotype-Tissue Expression (GTEx) pilot analysis: multitissue gene regulation in humans. *Science* 348(6235):648-660.
11. Snodgrass JG & Corwin J (1988) Pragmatics of measuring recognition memory: applications to dementia and amnesia. *J Exp Psychol Gen* 117(1):34-50.
12. Pollack ES & Norman VB (1964) A non-parametric analysis of recognition experiments. *Psychonomic Science* 1.
13. Orsini A & Laicardi C (2000) Factor structure of the Italian version of the WAIS-R compared with the American standardization. *Perceptual and motor skills* 90(3 Pt 2):1091-1100.
14. Oldfield RC (1971) The assessment and analysis of handedness: the Edinburgh inventory. *Neuropsychologia* 9(1):97-113.
15. Hollingshead AB & Redlich FC (2007) Social class and mental illness: a community study. 1958. *American journal of public health* 97(10):1756-1757.
16. First MB, Gibbon M, Spitzer RL, & Williams JBW (1996) Guide for the structured clinical interview for DSM-IV axis I disorders-Research version., (Biometrics Research, New York).
17. Friston KJ, Williams S, Howard R, Frackowiak RS, & Turner R (1996) Movement-related effects in fMRI time-series. *Magn Reson Med* 35(3):346-355.

18. Cassidy CM, *et al.* (2016) Dynamic Connectivity between Brain Networks Supports Working Memory: Relationships to Dopamine Release and Schizophrenia. *The Journal of neuroscience : the official journal of the Society for Neuroscience* 36(15):4377-4388.
19. Hayes AF (2012) PROCESS: A versatile computational tool for observed variable mediation, moderation, and conditional process modeling. [*White paper*].

**Supplementary Table1.** Genes in the *DRDI* gene set. The expression of genes in bold font is negatively correlated with the gene set eigengene. All gene-eigengene correlations are significant ( $p \leq 1.6 \times 10^{-7}$ ).

| Gene          | ID<br>Braincloud | ID<br>BrainEAC | Chr   | Stran<br>d | Start     | Stop      | Correlatio<br>n with<br>gene set<br>eigengene<br>(Pearson's<br>r) |
|---------------|------------------|----------------|-------|------------|-----------|-----------|-------------------------------------------------------------------|
| <i>ARAP1</i>  | hHC017995        | t3381241       | chr11 | -          | 72395373  | 72463414  | 0.66                                                              |
| <i>ATF5</i>   | hHC020747        | t3839103       | chr19 | +          | 50431393  | 50437188  | 0.68                                                              |
| <i>ATL2</i>   | hHC023382        | t2548776       | chr2  | -          | 38521117  | 38662637  | -0.75                                                             |
| <i>BCL7C</i>  | hHR022997        | t3688038       | chr16 | -          | 30845382  | 30905613  | 0.75                                                              |
| <i>CAPZA1</i> | hHR026867        | t2352228       | chr1  | +          | 113144301 | 113214213 | -0.69                                                             |
| <i>CCDC81</i> | hHC017139        | t3343293       | chr11 | +          | 86085803  | 86134148  | 0.64                                                              |
| <i>CCNY</i>   | hHC025213        | t3242425       | chr10 | +          | 35535804  | 35860851  | 0.66                                                              |
| <i>CCNYL1</i> | hHC029004        | t2525182       | chr2  | +          | 208576254 | 208626563 | -0.64                                                             |
| <i>CCPG1</i>  | hHA033972        | t3625326       | chr15 | -          | 55632255  | 55700706  | -0.59                                                             |
| <i>CHD4</i>   | hHC022301        | t3442054       | chr12 | -          | 6679260   | 6716806   | 0.75                                                              |
| <i>CHD8</i>   | hHR011006        | t3528078       | chr14 | +          | 21853383  | 21853961  | 0.76                                                              |
| <i>CHIC1</i>  | hHR002375        | t3981609       | chrX  | +          | 72782993  | 72906935  | -0.78                                                             |
| <i>CHTF8</i>  | hHR027714        | t3696454       | chr16 | -          | 69151920  | 69166482  | 0.71                                                              |
| <i>CPT1B</i>  | hHC016042        | t3966057       | chr22 | -          | 51007298  | 51021504  | 0.61                                                              |
| <i>CRKL</i>   | hHC019229        | t3937787       | chr22 | +          | 21271699  | 21308024  | 0.43                                                              |
| <i>CRLS1</i>  | hHA034867        | t3875242       | chr20 | +          | 5986743   | 6020695   | -0.72                                                             |
| <i>CTRL</i>   | hHC020947        | t3695983       | chr16 | -          | 67962417  | 67965755  | 0.56                                                              |
| <i>CULAB</i>  | hHR004728        | t4019900       | chrX  | -          | 119658474 | 119751514 | -0.87                                                             |
| <i>CUL9</i>   | hHC019676        | t2907754       | chr6  | +          | 43149932  | 43192318  | 0.69                                                              |



|                      |           |          |       |   |           |           |       |
|----------------------|-----------|----------|-------|---|-----------|-----------|-------|
| <i>DMBX1</i>         | hHC018003 | t2334847 | chr1  | + | 46964435  | 46981890  | 0.47  |
| <i>DNAJB2</i>        | hHC022495 | t2528426 | chr2  | + | 220144061 | 220152056 | 0.77  |
| <b><i>DRD1</i></b>   | hHC010798 | t2888010 | chr5  | - | 174867047 | 174914186 | -0.61 |
| <i>ENGASE</i>        | hHR015660 | t3736666 | chr17 | + | 77068718  | 77084674  | 0.55  |
| <i>ERAF</i>          | hHC023223 |          | chr16 | + | 31446686  | 31447624  | 0.51  |
| <i>FAM171A1</i>      | hHR009740 | t3279154 | chr10 | - | 15212428  | 15416551  | 0.36  |
| <b><i>FAM69A</i></b> | hHR010901 | t2423175 | chr1  | - | 93298463  | 93427025  | -0.83 |
| <i>FBF1</i>          | hHR023754 | t3771154 | chr17 | - | 73905660  | 73905777  | 0.61  |
| <b><i>FBXO11</i></b> | hHC013818 | t2552153 | chr2  | - | 48016104  | 48134792  | -0.83 |
| <i>GABBR1</i>        | hHR013309 | t2947889 | chr6  | - | 29556265  | 29611309  | 0.68  |
| <b><i>GADI</i></b>   | hHA035071 | t2514969 | chr2  | + | 171670391 | 171717661 | -0.87 |
| <i>GAK</i>           | hHC015505 | t2756673 | chr4  | - | 843110    | 926149    | 0.73  |
| <i>GCN1L1</i>        | hHC010736 | t3474256 | chr12 | - | 120565014 | 120632632 | 0.71  |
| <i>GFER</i>          | hHC024889 | t3644297 | chr16 | + | 2034155   | 2037747   | 0.74  |
| <b><i>GLIPR1</i></b> | hHC003812 | t3422855 | chr12 | + | 75874480  | 75895696  | -0.63 |
| <i>GNASAS</i>        | hHC012579 | t3911644 | chr20 | - | 57393838  | 57425958  | 0.51  |
| <b><i>GUF1</i></b>   | hHC005703 | t2725779 | chr4  | + | 44680454  | 44706387  | -0.81 |
| <i>HSD3B7</i>        | hHC019388 | t3656737 | chr16 | + | 30996532  | 31000455  | 0.66  |
| <i>HSF4</i>          | hHC022343 | t3665215 | chr16 | + | 67193888  | 67198077  | 0.78  |
| <i>IDUA</i>          | hHC014618 | t2714407 | chr4  | + | 966780    | 1008579   | 0.76  |
| <i>INPPL1</i>        | hHC021849 | t3339423 | chr11 | + | 71934262  | 71950148  | 0.47  |
| <i>IPO4</i>          | hHC017939 | t3557851 | chr14 | - | 24649263  | 24658104  | 0.47  |
| <b><i>KIF21A</i></b> | hHA036028 | t3450775 | chr12 | - | 39687033  | 39853696  | -0.88 |
| <i>KLHDC8B</i>       | hHC020742 | t2622006 | chr3  | + | 49207238  | 49213918  | 0.41  |
| <i>KLK3</i>          | hHA039893 | t3839538 | chr19 | + | 51358171  | 51365366  | 0.45  |
| <i>KRT8</i>          | hHR031337 | t3455516 | chr12 | - | 52914520  | 53343645  | 0.82  |
| <i>LRBA</i>          | hHC015424 | t2789266 | chr4  | - | 151185606 | 151936869 | 0.44  |
| <b><i>LYRM7</i></b>  | hHA035681 | t2828115 | chr5  | + | 130506483 | 130538094 | -0.86 |

|                |           |          |       |   |           |           |       |
|----------------|-----------|----------|-------|---|-----------|-----------|-------|
| <i>MAFK</i>    | hHR018888 | t2987199 | chr7  | + | 1550088   | 1580520   | 0.37  |
| <i>MAN2B1</i>  | hHC012345 | t3851545 | chr19 | - | 12757336  | 12777828  | 0.74  |
| <i>MAP2K3</i>  | hHC011325 | t3714729 | chr17 | + | 21187988  | 21218520  | 0.69  |
| <i>MAP3K3</i>  | hHC019533 | t3730806 | chr17 | + | 61699811  | 61773660  | 0.79  |
| <i>MGAT4A</i>  | hHC020284 | t2566414 | chr2  | - | 99233700  | 99347568  | -0.64 |
| <i>MIA3</i>    | hHC031255 | t2381865 | chr1  | + | 222840225 | 222842596 | -0.74 |
| <i>MKSI</i>    | hHC020431 | t3764199 | chr17 | - | 56282803  | 56296885  | 0.75  |
| <i>MMP15</i>   | hHC019951 | t3663074 | chr16 | + | 58056585  | 58145498  | 0.65  |
| <i>MNAT1</i>   | hHA035592 | t3538703 | chr14 | + | 61201460  | 61435480  | -0.39 |
| <i>MOV10</i>   | hHC019728 | t2352275 | chr1  | + | 113215783 | 113245690 | 0.62  |
| <i>MYH9</i>    | hHR022934 | t3959451 | chr22 | - | 36677332  | 36784036  | 0.56  |
| <i>NDST1</i>   | hHC026687 | t2835531 | chr5  | + | 149865285 | 149963329 | 0.50  |
| <i>NEGR1</i>   | hHR003325 | t2418078 | chr1  | - | 71868628  | 72748513  | -0.60 |
| <i>NSD1</i>    | hHC017145 | t2842951 | chr5  | + | 176545573 | 176724414 | 0.73  |
| <i>NUMA1</i>   | hHC019087 | t3380901 | chr11 | - | 71712261  | 71791719  | 0.78  |
| <i>OR1Q1</i>   | hHR018965 | t3188186 | chr9  | + | 125372029 | 125381771 | 0.47  |
| <i>OSBPL8</i>  | hHC005823 | t3462949 | chr12 | - | 76745119  | 76953589  | -0.45 |
| <i>PCNX</i>    | hHC018743 | t3542689 | chr14 | + | 71374122  | 71666427  | 0.42  |
| <i>PGPEP1</i>  | hHC023256 | t3824963 | chr19 | + | 18451431  | 18477726  | 0.62  |
| <i>PHF20L1</i> | hHA035883 | t3116535 | chr8  | + | 133787604 | 133871286 | -0.77 |
| <i>PIK3R1</i>  | hHA033950 | t2813060 | chr5  | + | 67272645  | 67597647  | -0.82 |
| <i>PLA2G15</i> | hHC018750 | t3666124 | chr16 | + | 68279253  | 68294958  | 0.67  |
| <i>PLEKHA1</i> | hHR003443 | t3268274 | chr10 | + | 124134148 | 124191852 | -0.85 |
| <i>PLOD1</i>   | hHC015919 | t2320581 | chr1  | + | 11994287  | 12035587  | 0.74  |
| <i>PLSCR3</i>  | hHC019988 | t3743701 | chr17 | - | 7291950   | 7298142   | 0.68  |
| <i>POU2F2</i>  | hHC026303 | t3863435 | chr19 | - | 42585012  | 42636615  | 0.68  |
| <i>PPP1CB</i>  | hHA035365 | t2475209 | chr2  | + | 28974624  | 29025796  | -0.86 |
| <i>PPP4R4</i>  | hHA032931 | t3549605 | chr14 | + | 94640649  | 94746072  | -0.83 |

|                 |           |          |       |   |           |           |       |
|-----------------|-----------|----------|-------|---|-----------|-----------|-------|
| <b>PPP4R4</b>   | hHA034126 | t3549605 | chr14 | + | 93710427  | 93815825  | -0.82 |
| <b>PSIP1</b>    | hHA036176 | t3199790 | chr9  | - | 15460303  | 15576931  | -0.88 |
| <b>PSIP1</b>    | hHA034232 | t3199790 | chr9  | - | 15454065  | 15500989  | -0.73 |
| <b>PSIP1</b>    | hHA040058 | t3199790 | chr9  | - | 15454065  | 15500989  | -0.83 |
| <b>PSME1</b>    | hHA038570 | t3529609 | chr14 | + | 24604814  | 24608139  | 0.61  |
| <b>PSME2</b>    | hHC032217 |          | chr14 | - | 23682414  | 23686270  | 0.63  |
| <b>QSOX1</b>    | hHC017919 | t2369950 | chr1  | + | 180086444 | 180169860 | 0.80  |
| <b>RCC2</b>     | hHC031015 | t2398894 | chr1  | - | 17733276  | 17787445  | 0.68  |
| <b>RECQL4</b>   | hHC026358 | t3158767 | chr8  | - | 145736675 | 145743245 | 0.66  |
| <b>ROR2</b>     | hHC015909 | t3214496 | chr9  | - | 94325383  | 94712434  | 0.59  |
| <b>RPS6KA2</b>  | hHR008402 | t2984655 | chr6  | - | 166809678 | 167328112 | 0.66  |
| <b>RPS6KB1</b>  | hHC031266 | t3729294 | chr17 | + | 57970457  | 58074323  | -0.58 |
| <b>RTN3</b>     | hHA034196 | t3333942 | chr11 | + | 63448921  | 63528015  | -0.73 |
| <b>SBDSP</b>    | hHR027838 |          | chr7  | + | 71744736  | 71749236  | -0.66 |
| <b>SCAMP3</b>   | hHC015426 | t2437307 | chr1  | - | 155225782 | 155232195 | 0.69  |
| <b>SCOC</b>     | hHA040719 | t2744980 | chr4  | + | 141105311 | 141328721 | -0.91 |
| <b>SCRIB</b>    | hHA039524 | t3157751 | chr8  | - | 144873106 | 144897533 | 0.60  |
| <b>SDCBP</b>    | hHA033272 | t3099750 | chr8  | + | 59442654  | 59496406  | -0.83 |
| <b>SEC22A</b>   | hHA034208 | t2639309 | chr3  | + | 122920747 | 122994410 | -0.71 |
| <b>SFII</b>     | hHC025436 | t3942998 | chr22 | + | 31891926  | 32014532  | 0.70  |
| <b>SFRS16</b>   | hHC024609 | t3835983 | chr19 | + | 45542297  | 45574205  | 0.79  |
| <b>SIX5</b>     | hHC015139 | t3865618 | chr19 | - | 46268046  | 46272312  | 0.69  |
| <b>SLC25A40</b> | hHC003156 | t3060245 | chr7  | - | 87462897  | 87505669  | -0.88 |
| <b>SLC26A6</b>  | hHC018185 | t2673547 | chr3  | - | 48663166  | 48672953  | 0.65  |
| <b>SLC6A15</b>  | hHA035353 | t3464276 | chr12 | - | 85253267  | 85338161  | -0.85 |
| <b>SLC6A8</b>   | hHR029029 | t3688878 | chr16 | - | 32797028  | 32896822  | 0.78  |
| <b>SMG5</b>     | hHC026654 | t2438042 | chr1  | - | 156219019 | 156252630 | 0.71  |
| <b>SNX14</b>    | hHA035514 | t2963313 | chr6  | - | 86215217  | 86307586  | -0.82 |

|                 |           |          |       |   |           |           |       |
|-----------------|-----------|----------|-------|---|-----------|-----------|-------|
| <i>SPSB1</i>    | hHC022973 | t2319252 | chr1  | + | 9352942   | 9429580   | 0.77  |
| <i>SPTLC1</i>   | hHA035186 | t3214582 | chr9  | - | 94765899  | 94877690  | -0.83 |
| <i>SRRT</i>     | hHC020421 | t3015941 | chr7  | + | 100472608 | 100486284 | 0.68  |
| <i>ST5</i>      | hHC009572 | t3361971 | chr11 | - | 8713154   | 8932493   | 0.68  |
| <i>TACC3</i>    | hHC020076 | t2714955 | chr4  | + | 1722818   | 1746895   | 0.60  |
| <i>TIMELESS</i> | hHC011418 | t3457824 | chr12 | - | 56810167  | 56843192  | 0.63  |
| <i>TM7SF3</i>   | hHA034151 | t3448481 | chr12 | - | 27124527  | 27167327  | -0.84 |
| <i>TMCC2</i>    | hHC013227 | t2376376 | chr1  | + | 205197324 | 205242465 | 0.76  |
| <i>TMEM132E</i> | hHC019221 | t3718236 | chr17 | + | 32819166  | 32966327  | 0.72  |
| <i>TMEM49</i>   | hHA034602 | t3764916 | chr17 | - | 57915313  | 57917744  | -0.86 |
| <i>TMTC3</i>    | hHC010424 | t3425134 | chr12 | + | 88536101  | 88593655  | -0.82 |
| <i>TPCN2</i>    | hHC022004 | t3337918 | chr11 | + | 68816365  | 68929908  | 0.53  |
| <i>UBA2</i>     | hHR009662 | t3829768 | chr19 | + | 34919277  | 35003208  | -0.87 |
| <i>UBE2N</i>    | hHC029873 | t3465791 | chr12 | - | 93802088  | 93861489  | -0.65 |
| <i>UBTD1</i>    | hHC024134 | t3259888 | chr10 | + | 99258689  | 99330958  | 0.67  |
| <i>XRCC3</i>    | hHC022265 | t3580832 | chr14 | - | 104158599 | 104181796 | 0.64  |
| <i>ZBTB33</i>   | hHC009280 | t3989089 | chrX  | + | 119378531 | 119392247 | -0.83 |
| <i>ZDHHC21</i>  | hHR005601 | t3199431 | chr9  | - | 14546162  | 14693787  | -0.70 |
| <i>ZKSCAN5</i>  | hHC015797 | t3014855 | chr7  | + | 99086950  | 99132313  | 0.68  |
| <i>ZMAT3</i>    | hHC013459 | t2706791 | chr3  | - | 178734260 | 178789572 | -0.88 |
| <i>ZNF473</i>   | hHR013607 | t3839142 | chr19 | + | 50528999  | 50556664  | 0.59  |
| <i>ZNF579</i>   | hHC014534 | t3871557 | chr19 | - | 56075948  | 56098806  | 0.79  |
| <i>ZNF672</i>   | hHC021765 | t2390489 | chr1  | + | 249132100 | 249143713 | 0.74  |

**Supplementary Table 2.** Weights assigned to each genotype of each SNP when computing the PCI.

| SNP        | Genotype   | Weight      |
|------------|------------|-------------|
| rs7487813  | GG         | 0.5         |
| rs7487813  | T-carriers | 0.682083353 |
| rs2267844  | CC         | 0.763360813 |
| rs2267844  | CT         | 0.512798454 |
| rs2267844  | TT         | 0.5         |
| rs663208   | CC         | 0.765595704 |
| rs663208   | CT         | 0.613451133 |
| rs663208   | TT         | 0.5         |
| rs17005918 | C-carriers | 0.353816908 |
| rs17005918 | TT         | 0.5         |
| rs13101217 | AA         | 0.466639623 |
| rs13101217 | AG         | 0.316876696 |
| rs13101217 | GG         | 0.5         |
| rs1859464  | CC         | 0.5         |
| rs1859464  | T-carriers | 0.631121557 |
| rs2278214  | CC         | 0.5         |

|           |    |             |
|-----------|----|-------------|
| rs2278214 | CT | 0.575577855 |
| rs2278214 | TT | 0.782451245 |

|           |    |             |
|-----------|----|-------------|
| rs7915524 | CC | 0.719045851 |
| rs7915524 | CT | 0.487986131 |
| rs7915524 | TT | 0.5         |

|            |    |             |
|------------|----|-------------|
| rs12509826 | CC | 0.234989278 |
| rs12509826 | CT | 0.482600588 |
| rs12509826 | TT | 0.5         |

|            |    |             |
|------------|----|-------------|
| rs10134399 | CC | 0.5         |
| rs10134399 | CT | 0.622919329 |
| rs10134399 | TT | 0.698026883 |

|            |    |             |
|------------|----|-------------|
| rs10906841 | AA | 0.706580205 |
| rs10906841 | AG | 0.530555236 |
| rs10906841 | GG | 0.5         |

|           |    |             |
|-----------|----|-------------|
| rs2306251 | AA | 0.5         |
| rs2306251 | AG | 0.633938465 |
| rs2306251 | GG | 0.61574862  |

|            |    |             |
|------------|----|-------------|
| rs11602122 | CC | 0.5         |
| rs11602122 | CT | 0.602444381 |
| rs11602122 | TT | 0.331436767 |

**Supplementary Table 3.** Specification of the single nucleotide polymorphisms (SNPs) included in *DRDI*-PCI calculation. Abbreviations: MAF, minor allele frequency.

| Rank | SNP        | Locus    | Module Gene     | Gene name                                                                                 | Position        | MAF  | Type of variant                                      |
|------|------------|----------|-----------------|-------------------------------------------------------------------------------------------|-----------------|------|------------------------------------------------------|
| 1    | rs7487813  | 12q22    | <i>UBE2N</i>    | Ubiquitin Conjugating Enzyme E2 N                                                         | chr12:92311700  | 0.18 | Intron variant                                       |
| 2    | rs2267844  | 3p21.31  | <i>SLC26A6</i>  | Solute Carrier Family 26 Member 6                                                         | chr3:48566500   | 0.23 | Intron variant ( <i>PFKFB4</i> )                     |
| 3    | rs663208   | 11q14.2  | <i>CCDC81</i>   | Coiled-Coil Domain Containing 81                                                          | chr11:85870900  | 0.23 | Intron variant ( <i>ME3</i> )                        |
| 4    | rs17005918 | 4q31.1   | <i>SCOC</i>     | Short Coiled-Coil Protein                                                                 | chr4:141584000  | 0.19 | 3 prime UTR variant ( <i>RP11-542P2.1</i> )          |
| 5    | rs13101217 | 3q21.1   | <i>SEC22A</i>   | SEC22 Homolog A, Vesicle Trafficking Protein                                              | chr3:124449000  | 0.35 | Intron variant                                       |
| 6    | rs1859464  | 14q24.2  | <i>PCNX1</i>    | Pecanex Homolog (Drosophila)                                                              | chr14:70357600  | 0.14 | Intergenic variant                                   |
| 7    | rs2278214  | 2q11.2   | <i>MGAT4A</i>   | Mannosyl (Alpha-1,3-) - Glycoprotein Beta-1,4-N-Acetylglucosaminyl transferase, Isozyme A | chr2:98502200   | 0.21 | Non coding transcript exon variant ( <i>INPP4A</i> ) |
| 8    | rs7915524  | 10p13    | <i>FAM171A1</i> | Family With Sequence Similarity 171 Member A1                                             | chr10:15333900  | 0.19 | Intron variant                                       |
| 9    | rs12509826 | 4q31.1   | <i>SCOC</i>     | Short Coiled-Coil Protein                                                                 | chr4:141601000  | 0.25 | Intron variant ( <i>RP11-542P2.1</i> )               |
| 10   | rs10134399 | 14q32.33 | <i>XRCC3</i>    | X-Ray Repair Cross Complementing 3                                                        | chr14:103153000 | 0.31 | Intron variant ( <i>RP11-73M18.2</i> )               |
| 11   | rs10906841 | 10p13    | <i>FAM171A1</i> | Family With Sequence Similarity 171 Member A1                                             | chr10:15243300  | 0.34 | Intron variant ( <i>NMT2</i> )                       |
| 12   | rs2306251  | 4p16.3   | <i>GAK</i>      | Cyclin G Associated Kinase                                                                | chr4:776401     | 0.25 | Splice region variant ( <i>CPLX1</i> )               |
| 13   | rs11602122 | 11q13.3  | <i>TPCN2</i>    | Two Pore Segment Channel 2                                                                | chr11:68537600  | 0.22 | Intron variant ( <i>RP11-554A11.6</i> )              |

## Supplementary Figure 1

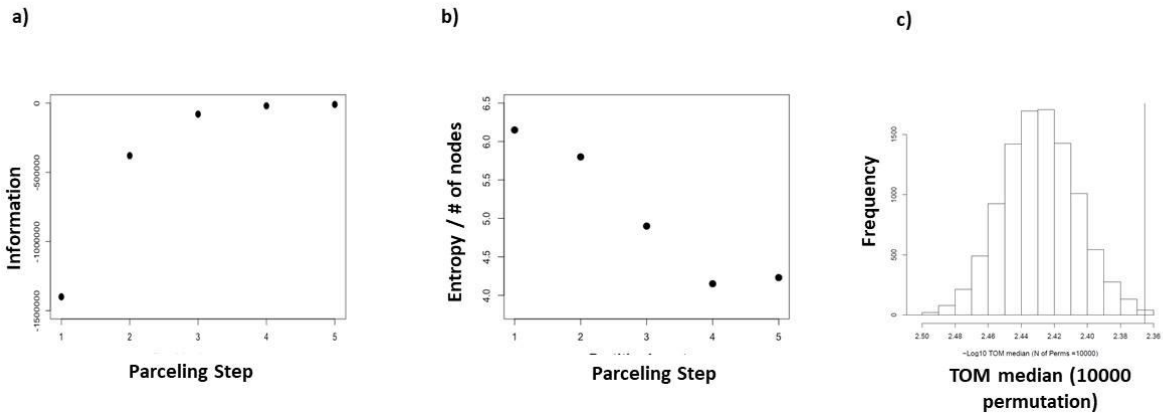

**Identification of the DRD1 gene community.** Panel a) represents the information content of the *DRD1* gene communities obtained with iterative partitions based on the average betweenness of the nodes in Braincloud. Note that information plateaus after three-four cycles. Panel b) shows entropy per node variation corresponding to each iteration in Braincloud. The minimum entropy is found after four cycles. Panel c) is a histogram of resampled topological overlap matrices based on random genes in BrainEAC and the vertical continuous line on the right shows the topological overlap of the genes in the *DRD1* community obtained following the procedure illustrated in panels a) and b). The graph is cut on the x-axis because the overlap is off-scale with respect to random resampling. Thus, the overlap is greater than chance in the replication microarray post mortem dataset.



## Supplementary Figure 2

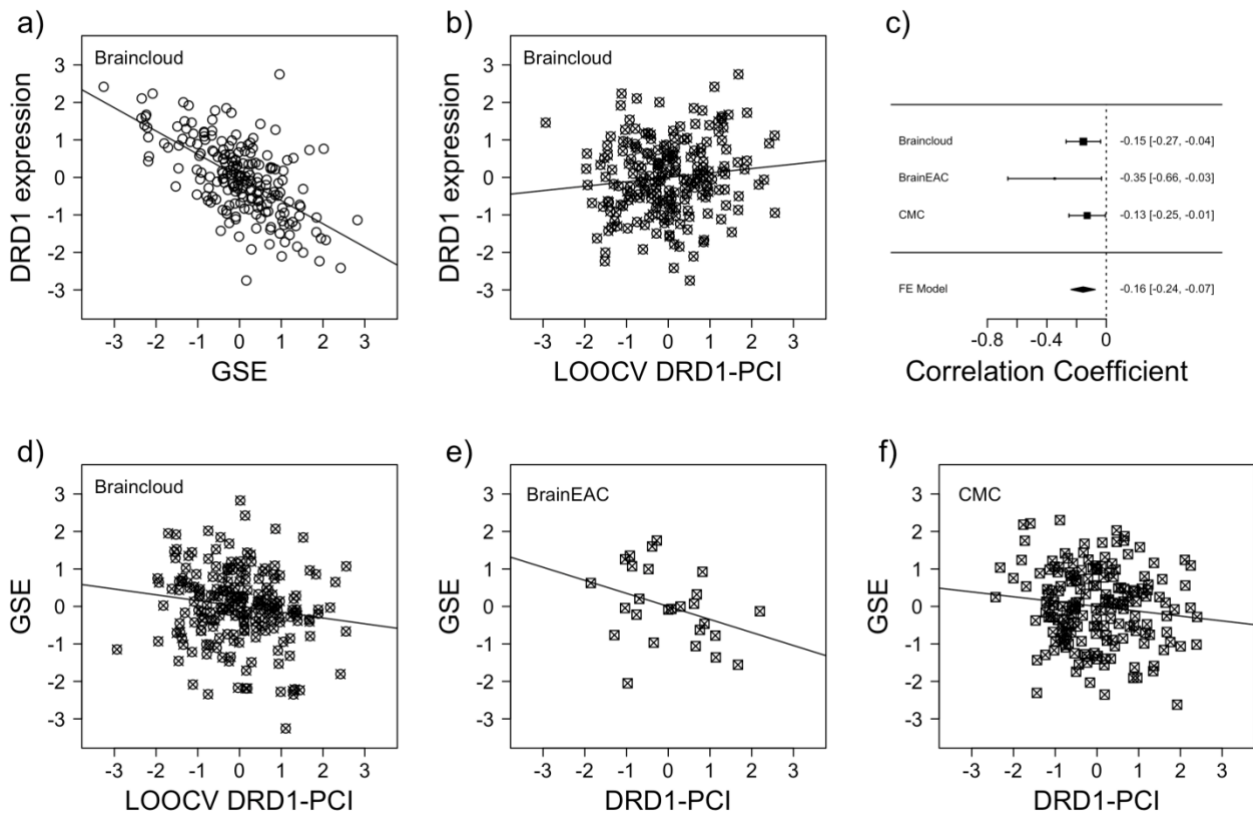

### Associations between the *DRD1*-PCI, the Gene Set Eigengene (GSE), and *DRD1* expression.

Trendlines represent the linear regression fits in panels a-b) and d-e-f). All units in the scatter plots represent Z-scores of the variables indicated on the axes. a) This panel illustrates the inverted relationship between *DRD1* expression and the GSE in Braincloud. It is worth noting that the *DRD1*-PCI was defined in Braincloud as an index negatively correlated to the GSE. b) This panel illustrates the relationship between observed *DRD1* expression and the leave-one-out cross validated PCI (LOOCV *DRD1*-PCI) in Braincloud. c) Forest plot shows the size of the correlation between the *DRD1*-PCI and the GSE in subjects independent from the training set (the LOOCV *DRD1*-PCI was used for Braincloud). The diamond represents the fixed effect (FE) meta-analysis effect size. d) The X-axis depicts the LOOCV *DRD1*-PCI, whereas the Y-axis reports the observed GSE in Braincloud (the training dataset). e) Correlation observed in BrainEAC between the *DRD1*-

PCI and the GSE. f) Correlation observed in CommonMind Consortium (CMC) data between the *DRD1*-PCI and the GSE.

### Supplementary Figure 3

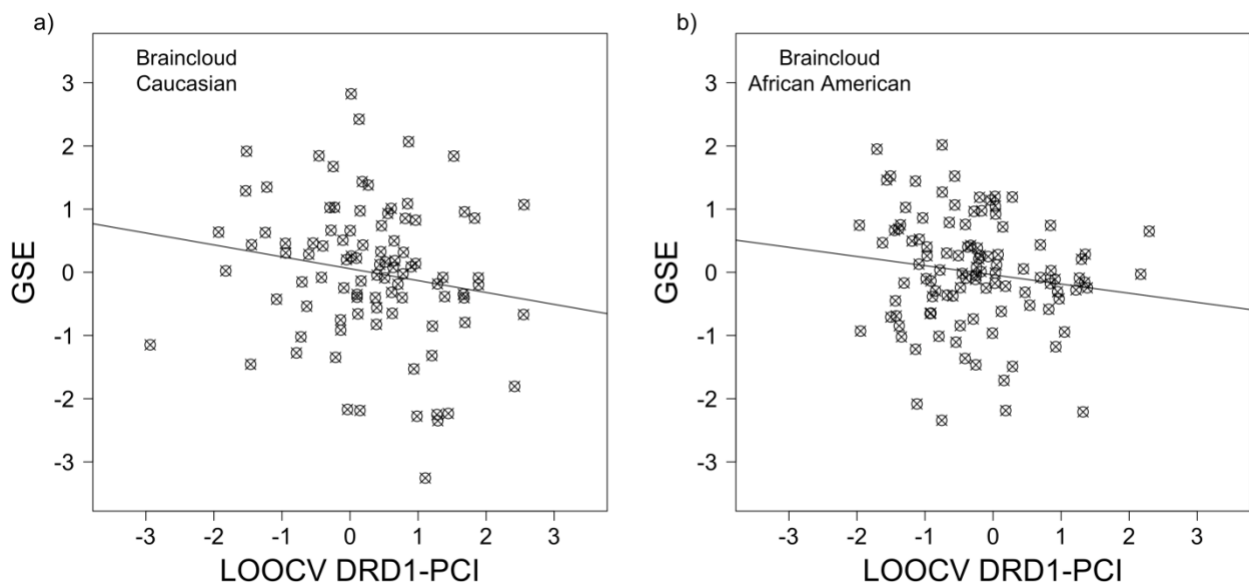

**Correlation between the Gene Set Eigengene (GSE) and leave-one-out cross validated PCI (LOOCV *DRD1*-PCI) in Braincloud subjects of Caucasian and African American ancestry.**

The scatterplot illustrates the association of the LOOCV *DRD1*-PCI with the GSE in both ethnicities.

## Supplementary Figure 4

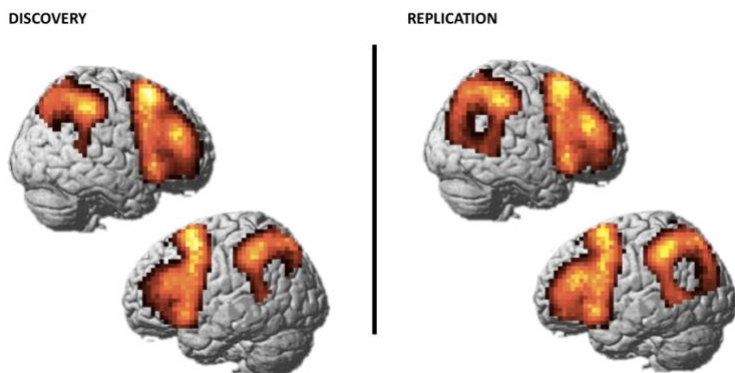

**Activation maps of WM-related activity.** Left: main effect of task (conjunction null(1,2,3 back) > baseline) for the discovery sample ( $p < 0.05$ ). Right: main effect of task (WM (2 back) > baseline) for the replication sample ( $p < 0.05$ )

## Supplementary Figure 5

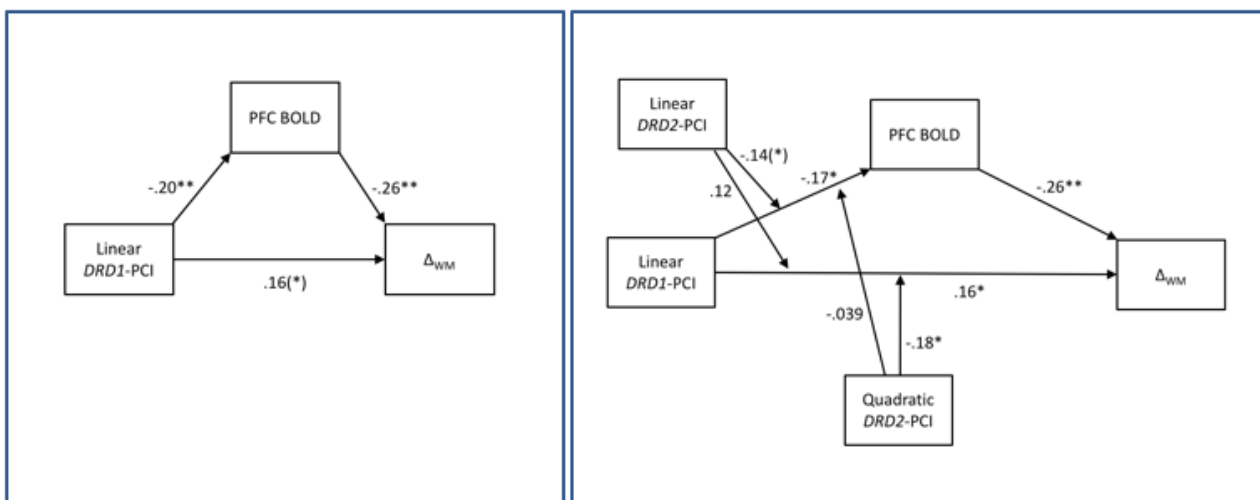

**Mediation analysis models and results.** Left: discovery sample, mediation model. Right: discovery sample, mediation/moderation model. Statistical significance is represented as follows:

(\*) =  $p < .1$ ; \* =  $p < .05$ ; \*\* =  $p < .01$ .
